# Supplementary material for: Astaxanthin Ameliorates Worsened Muscle Dysfunction of MDX Mice Fed with a High-Fat Diet through Reducing Lipotoxicity and Regulating Gut Microbiota
Source: MDPI journal article supplement (doi:10.3390/nu16010033), 2023-12-21
Supplement: s1 [file s1]

Supplementary Table S1: Potential lipid biomarkers based on the criteria of  $FC \geq 2$  or  $\leq 0.5$  and VIP  $> 1$  in HFD vs. ND.

| Lipid species           | Class      | FC    | VIP  | Trend |
|-------------------------|------------|-------|------|-------|
| BiotinylPE(31:0)        | BiotinylPE | 2.33  | 1.27 | Up    |
| BisMePA(28:0_18:1)      | BisMePA    | 18.14 | 1.29 | Up    |
| BisMePA(31:0_18:1)      | BisMePA    | 4.12  | 1.29 | Up    |
| BisMePA(40:7e)          | BisMePA    | 2.47  | 1.38 | Up    |
| BisMePA(38:7e)          | BisMePA    | 2.16  | 1.39 | Up    |
| BisMePA(18:0_16:0)      | BisMePA    | 2.09  | 1.23 | Up    |
| BisMePE(16:0_20:4)      | BisMePE    | 2.48  | 1.37 | Up    |
| Cer(m17:1_17:1)         | Cer        | 40.94 | 1.40 | Up    |
| Cer(m18:1_18:0)         | Cer        | 8.73  | 1.38 | Up    |
| Cer(m18:1_20:0)         | Cer        | 5.86  | 1.34 | Up    |
| Cer(d44:0+O)            | Cer        | 4.71  | 1.04 | Up    |
| Cer(t42:3)              | Cer        | 4.51  | 1.12 | Up    |
| Cer(m18:1_21:0)         | Cer        | 4.07  | 1.27 | Up    |
| Cer(m18:0_16:0)         | Cer        | 4.02  | 1.33 | Up    |
| Cer(d18:1_25:0+O)       | Cer        | 3.85  | 1.01 | Up    |
| Cer(m18:1_22:0)         | Cer        | 3.52  | 1.31 | Up    |
| Cer(d43:0)              | Cer        | 3.23  | 1.01 | Up    |
| Cer(m18:1_23:0)         | Cer        | 3.05  | 1.34 | Up    |
| Cer(d44:0)              | Cer        | 2.83  | 1.01 | Up    |
| Cer(m18:1_24:1)         | Cer        | 2.51  | 1.22 | Up    |
| Cer(m18:0_18:0)         | Cer        | 2.18  | 1.31 | Up    |
| CerG3GNAc2(d34:1)       | CerG3GNAc2 | 2.20  | 1.12 | Up    |
| CerPE(d18:1_15:1)       | CerPE      | 2.45  | 1.03 | Up    |
| CL(20:5_22:5_22:6_18:2) | CL         | 6.63  | 1.13 | Up    |
| CL(79:11)               | CL         | 6.62  | 1.21 | Up    |
| CL(82:16)               | CL         | 5.65  | 1.09 | Up    |
| CL(80:15)               | CL         | 2.96  | 1.25 | Up    |
| CL(84:14)               | CL         | 2.76  | 1.10 | Up    |
| CL(86:12)               | CL         | 2.73  | 1.32 | Up    |
| CL(74:7)                | CL         | 2.64  | 1.34 | Up    |
| CL(18:2_22:5_22:6_18:2) | CL         | 2.49  | 1.29 | Up    |
| CL(86:14)               | CL         | 2.30  | 1.34 | Up    |
| CL(84:13)               | CL         | 2.28  | 1.19 | Up    |
| CL(83:10)               | CL         | 2.23  | 1.33 | Up    |
| CL(81:8)                | CL         | 2.21  | 1.37 | Up    |
| CL(84:16)               | CL         | 2.14  | 1.39 | Up    |
| CL(85:8)                | CL         | 2.02  | 1.28 | Up    |
| CL(80:11)               | CL         | 2.00  | 1.32 | Up    |
| CL(86:13)               | CL         | 2.00  | 1.28 | Up    |
| DG(34:0)                | DG         | 44.74 | 1.39 | Up    |
| DG(16:0_18:2)           | DG         | 9.46  | 1.25 | Up    |

|               |       |      |      |    |
|---------------|-------|------|------|----|
| DG(22:5_20:4) | DG    | 8.54 | 1.34 | Up |
| DG(38:2e)     | DG    | 7.74 | 1.38 | Up |
| DG(35:2e)     | DG    | 6.26 | 1.34 | Up |
| DG(36:0e)     | DG    | 6.11 | 1.40 | Up |
| DG(24:0e)     | DG    | 5.37 | 1.38 | Up |
| DG(24:2e)     | DG    | 5.15 | 1.31 | Up |
| DG(26:3e)     | DG    | 4.88 | 1.38 | Up |
| DG(40:3e)     | DG    | 4.64 | 1.39 | Up |
| DG(34:0e)     | DG    | 4.33 | 1.40 | Up |
| DG(36:3e)     | DG    | 4.14 | 1.40 | Up |
| DG(26:2e)     | DG    | 4.12 | 1.34 | Up |
| DG(26:1e)     | DG    | 4.03 | 1.35 | Up |
| DG(28:4e)     | DG    | 4.03 | 1.35 | Up |
| DG(35:0e)     | DG    | 3.92 | 1.39 | Up |
| DG(50:1)      | DG    | 3.76 | 1.37 | Up |
| DG(24:3e)     | DG    | 3.68 | 1.34 | Up |
| DG(22:0e)     | DG    | 3.66 | 1.35 | Up |
| DG(54:2)      | DG    | 3.60 | 1.34 | Up |
| DG(22:6_14:1) | DG    | 3.46 | 1.18 | Up |
| DG(40:1e)     | DG    | 3.46 | 1.35 | Up |
| DG(33:0e)     | DG    | 3.31 | 1.39 | Up |
| DG(18:1e)     | DG    | 3.07 | 1.25 | Up |
| DG(22:2e)     | DG    | 3.01 | 1.32 | Up |
| DG(40:6e)     | DG    | 2.77 | 1.34 | Up |
| DG(38:1e)     | DG    | 2.70 | 1.34 | Up |
| DG(40:4e)     | DG    | 2.70 | 1.34 | Up |
| DG(18:0e)     | DG    | 2.67 | 1.34 | Up |
| DG(33:3e)     | DG    | 2.60 | 1.38 | Up |
| DG(16:0_16:1) | DG    | 2.57 | 1.23 | Up |
| DG(16:1_18:3) | DG    | 2.57 | 1.23 | Up |
| DG(18:0_18:1) | DG    | 2.50 | 1.28 | Up |
| DG(16:0_14:0) | DG    | 2.49 | 1.11 | Up |
| DG(31:0e)     | DG    | 2.47 | 1.38 | Up |
| DG(50:0)      | DG    | 2.39 | 1.27 | Up |
| DG(26:0e)     | DG    | 2.35 | 1.25 | Up |
| DG(28:3e)     | DG    | 2.35 | 1.25 | Up |
| DG(20:1e)     | DG    | 2.22 | 1.25 | Up |
| DG(36:1e)     | DG    | 2.21 | 1.38 | Up |
| DG(16:0_20:5) | DG    | 2.18 | 1.17 | Up |
| DG(38:8e)     | DG    | 2.11 | 1.17 | Up |
| DG(15:0_18:1) | DG    | 2.02 | 1.17 | Up |
| DG(30:3e)     | DG    | 2.02 | 1.37 | Up |
| DGDG(47:7)    | DGDG  | 3.84 | 1.00 | Up |
| dMePE(36:4)   | dMePE | 2.39 | 1.35 | Up |

|                   |        |       |      |    |
|-------------------|--------|-------|------|----|
| dMePE(18:0e_22:4) | dMePE  | 2.01  | 1.24 | Up |
| LBPA(16:0_20:4)   | LBPA   | 2.28  | 1.14 | Up |
| LdMePE(22:5)      | LdMePE | 2.33  | 1.26 | Up |
| LPC(22:5)         | LPC    | 2.16  | 1.23 | Up |
| LPE(22:5)         | LPE    | 2.30  | 1.24 | Up |
| MePC(37:3e)       | MePC   | 2.77  | 1.36 | Up |
| MePC(38:4e)       | MePC   | 2.70  | 1.11 | Up |
| MePC(38:9)        | MePC   | 2.31  | 1.29 | Up |
| MePC(29:1e)       | MePC   | 2.25  | 1.05 | Up |
| MePC(32:3e)       | MePC   | 2.16  | 1.39 | Up |
| MGDG(34:0)        | MGDG   | 10.10 | 1.28 | Up |
| MGDG(34:1)        | MGDG   | 3.10  | 1.25 | Up |
| MGDG(42:8)        | MGDG   | 2.30  | 1.35 | Up |
| PC(28:1_18:2)     | PC     | 3.09  | 1.02 | Up |
| PC(32:4e)         | PC     | 2.86  | 1.18 | Up |
| PC(22:5_13:0)     | PC     | 2.56  | 1.35 | Up |
| PC(34:9)          | PC     | 2.50  | 1.27 | Up |
| PC(17:0_18:1)     | PC     | 2.33  | 1.31 | Up |
| PC(37:4)          | PC     | 2.33  | 1.31 | Up |
| PC(22:4_22:5)     | PC     | 2.29  | 1.25 | Up |
| PC(16:0_22:5)     | PC     | 2.25  | 1.35 | Up |
| PC(18:0_20:2)     | PC     | 2.24  | 1.30 | Up |
| PC(18:4_22:6)     | PC     | 2.18  | 1.38 | Up |
| PC(18:3e_18:2)    | PC     | 2.15  | 1.31 | Up |
| PC(38:8e)         | PC     | 2.15  | 1.36 | Up |
| PC(38:0e)         | PC     | 2.14  | 1.26 | Up |
| PC(17:1_20:5)     | PC     | 2.06  | 1.02 | Up |
| PC(19:5e)         | PC     | 2.05  | 1.17 | Up |
| PE(20:0p_22:5)    | PE     | 3.61  | 1.19 | Up |
| PE(47:3)          | PE     | 2.79  | 1.16 | Up |
| PE(16:0_22:5)     | PE     | 2.66  | 1.37 | Up |
| PE(20:3_22:3)     | PE     | 2.47  | 1.26 | Up |
| PE(20:0_20:2)     | PE     | 2.46  | 1.26 | Up |
| PE(20:2_22:3)     | PE     | 2.41  | 1.31 | Up |
| PE(36:3e)         | PE     | 2.16  | 1.39 | Up |
| PE(22:3_22:5)     | PE     | 2.11  | 1.21 | Up |
| PE(44:10)         | PE     | 2.11  | 1.20 | Up |
| PE(42:4e)         | PE     | 2.01  | 1.24 | Up |
| PE(18:0_22:3)     | PE     | 2.00  | 1.26 | Up |
| PG(22:5_22:5)     | PG     | 2.82  | 1.24 | Up |
| PG(18:0_22:5)     | PG     | 2.67  | 1.30 | Up |
| PI(34:1e)         | PI     | 7.93  | 1.15 | Up |
| PI(16:0_18:1)     | PI     | 3.11  | 1.22 | Up |
| PS(22:6_22:6)     | PS     | 2.69  | 1.27 | Up |

|                     |      |       |      |    |
|---------------------|------|-------|------|----|
| PS(40:8e)           | PS   | 2.62  | 1.33 | Up |
| PS(38:7)            | PS   | 2.25  | 1.34 | Up |
| PS(16:0_18:2)       | PS   | 2.21  | 1.23 | Up |
| PS(42:6e)           | PS   | 2.17  | 1.20 | Up |
| PS(44:7)            | PS   | 2.05  | 1.29 | Up |
| SM(t34:0)           | SM   | 3.16  | 1.39 | Up |
| SM(t18:0_24:3)      | SM   | 2.92  | 1.22 | Up |
| SM(d18:2_16:0)      | SM   | 2.56  | 1.20 | Up |
| SM(d36:5)           | SM   | 2.56  | 1.20 | Up |
| SM(t18:0_23:6)      | SM   | 2.49  | 1.08 | Up |
| SM(t41:0)           | SM   | 2.35  | 1.25 | Up |
| SM(t38:0)           | SM   | 2.29  | 1.13 | Up |
| SQDG(51:12)         | SQDG | 6.74  | 1.17 | Up |
| SQDG(48:12)         | SQDG | 5.11  | 1.24 | Up |
| SQDG(36:6)          | SQDG | 4.96  | 1.32 | Up |
| SQDG(38:5)          | SQDG | 3.25  | 1.30 | Up |
| SQDG(36:2)          | SQDG | 2.28  | 1.21 | Up |
| StE(38:2)           | StE  | 2.33  | 1.03 | Up |
| TG(16:0e_9:0_9:0)   | TG   | 44.74 | 1.39 | Up |
| TG(53:2)            | TG   | 43.97 | 1.28 | Up |
| TG(19:1_17:1_19:1)  | TG   | 34.86 | 1.22 | Up |
| TG(15:0_6:0_18:3)   | TG   | 34.15 | 1.39 | Up |
| TG(16:1_6:0_20:4)   | TG   | 33.77 | 1.41 | Up |
| TG(57:3)            | TG   | 30.35 | 1.25 | Up |
| TG(18:1_18:2_20:2)  | TG   | 24.60 | 1.10 | Up |
| TG(20:2e_14:4_16:0) | TG   | 16.57 | 1.23 | Up |
| TG(18:0_6:0_13:0)   | TG   | 15.95 | 1.40 | Up |
| TG(15:0_6:0_18:1)   | TG   | 15.22 | 1.40 | Up |
| TG(17:1_17:1_17:1)  | TG   | 14.78 | 1.19 | Up |
| TG(15:0_6:0_16:0)   | TG   | 12.56 | 1.40 | Up |
| TG(15:0_18:1_18:2)  | TG   | 12.43 | 1.08 | Up |
| TG(72:2)            | TG   | 12.30 | 1.37 | Up |
| TG(18:4_18:1_18:1)  | TG   | 12.25 | 1.13 | Up |
| TG(16:0_6:0_12:0)   | TG   | 11.70 | 1.40 | Up |
| TG(20:2e_18:1_20:4) | TG   | 11.54 | 1.39 | Up |
| TG(25:1_9:0_9:0)    | TG   | 11.03 | 1.37 | Up |
| TG(70:3)            | TG   | 10.89 | 1.40 | Up |
| TG(70:5)            | TG   | 10.82 | 1.40 | Up |
| TG(28:0_18:0_24:2)  | TG   | 10.04 | 1.39 | Up |
| TG(16:0_11:3_14:1)  | TG   | 9.93  | 1.33 | Up |
| TG(19:1_16:0_18:1)  | TG   | 9.85  | 1.37 | Up |
| TG(12:1e_11:1_11:1) | TG   | 9.46  | 1.25 | Up |
| TG(30:0_18:1_24:1)  | TG   | 9.42  | 1.38 | Up |
| TG(19:1_19:1_19:1)  | TG   | 9.19  | 1.29 | Up |

|                     |    |      |      |    |
|---------------------|----|------|------|----|
| TG(18:0e_6:0_8:0)   | TG | 9.07 | 1.32 | Up |
| TG(58:7e)           | TG | 8.93 | 1.39 | Up |
| TG(14:0_11:4_14:0)  | TG | 8.83 | 1.40 | Up |
| TG(18:2e_16:0_18:1) | TG | 8.53 | 1.18 | Up |
| TG(20:3e_16:0_18:3) | TG | 8.53 | 1.18 | Up |
| TG(18:0_18:0_18:0)  | TG | 8.46 | 1.41 | Up |
| TG(51:1)            | TG | 8.10 | 1.37 | Up |
| TG(26:1_6:0_14:1)   | TG | 8.07 | 1.05 | Up |
| TG(16:0_11:3_16:0)  | TG | 8.05 | 1.38 | Up |
| TG(49:8e)           | TG | 7.91 | 1.15 | Up |
| TG(9:0_14:0_18:2)   | TG | 7.91 | 1.39 | Up |
| TG(70:1)            | TG | 7.86 | 1.39 | Up |
| TG(16:0_6:0_16:1)   | TG | 7.77 | 1.40 | Up |
| TG(28:0_16:0_24:2)  | TG | 7.65 | 1.39 | Up |
| TG(20:0e_16:1_18:1) | TG | 7.63 | 1.37 | Up |
| TG(16:0_18:1_22:0)  | TG | 7.09 | 1.40 | Up |
| TG(16:1_16:1_20:1)  | TG | 6.79 | 1.35 | Up |
| TG(59:6e)           | TG | 6.73 | 1.39 | Up |
| TG(28:1_18:1_23:0)  | TG | 6.66 | 1.39 | Up |
| TG(72:4)            | TG | 6.61 | 1.38 | Up |
| TG(16:1_11:2_14:0)  | TG | 6.52 | 1.37 | Up |
| TG(16:0_6:0_10:0)   | TG | 6.24 | 1.30 | Up |
| TG(4:0_15:0_18:1)   | TG | 6.22 | 1.35 | Up |
| TG(16:0_11:4_16:0)  | TG | 6.17 | 1.31 | Up |
| TG(16:0_18:1_24:0)  | TG | 6.04 | 1.40 | Up |
| TG(30:0_18:1_18:1)  | TG | 6.03 | 1.39 | Up |
| TG(14:0e_10:1_12:2) | TG | 5.91 | 1.26 | Up |
| TG(26:0_16:0_18:1)  | TG | 5.90 | 1.37 | Up |
| TG(30:0_18:1_24:2)  | TG | 5.75 | 1.36 | Up |
| TG(16:0_18:1_21:0)  | TG | 5.70 | 1.40 | Up |
| TG(18:0e_16:0_18:1) | TG | 5.67 | 1.39 | Up |
| TG(16:0_18:1_23:0)  | TG | 5.66 | 1.40 | Up |
| TG(28:0_18:1_24:2)  | TG | 5.62 | 1.36 | Up |
| TG(4:0_16:0_16:0)   | TG | 5.60 | 1.40 | Up |
| TG(16:0_10:1_16:1)  | TG | 5.58 | 1.36 | Up |
| TG(16:1_11:1_12:0)  | TG | 5.49 | 1.38 | Up |
| TG(16:0_11:3_18:1)  | TG | 5.32 | 1.37 | Up |
| TG(4:0_14:0_16:1)   | TG | 5.32 | 1.39 | Up |
| TG(18:0e_16:0_16:0) | TG | 5.31 | 1.23 | Up |
| TG(25:0_16:0_18:1)  | TG | 5.14 | 1.41 | Up |
| TG(17:0_6:0_18:2)   | TG | 4.73 | 1.38 | Up |
| TG(28:0_16:0_18:1)  | TG | 4.72 | 1.37 | Up |
| TG(28:0_20:4_22:1)  | TG | 4.68 | 1.34 | Up |
| TG(68:2)            | TG | 4.64 | 1.34 | Up |

|                     |    |      |      |    |
|---------------------|----|------|------|----|
| TG(30:1_18:1_19:0)  | TG | 4.58 | 1.38 | Up |
| TG(16:0_16:0_17:1)  | TG | 4.57 | 1.40 | Up |
| TG(26:0_18:1_24:2)  | TG | 4.55 | 1.36 | Up |
| TG(68:3)            | TG | 4.54 | 1.39 | Up |
| TG(16:0_12:0_14:0)  | TG | 4.40 | 1.28 | Up |
| TG(18:1_10:3_18:1)  | TG | 4.39 | 1.30 | Up |
| TG(18:1_18:1_24:0)  | TG | 4.39 | 1.34 | Up |
| TG(16:0_9:0_18:1)   | TG | 4.35 | 1.37 | Up |
| TG(20:0_18:1_18:1)  | TG | 4.35 | 1.37 | Up |
| TG(70:6)            | TG | 4.29 | 1.40 | Up |
| TG(18:0_18:0_20:1)  | TG | 4.24 | 1.38 | Up |
| TG(16:1_12:0_14:0)  | TG | 4.20 | 1.34 | Up |
| TG(18:3_14:1_18:2)  | TG | 4.15 | 1.35 | Up |
| TG(23:0_10:3_10:3)  | TG | 4.13 | 1.16 | Up |
| TG(53:3)            | TG | 4.10 | 1.11 | Up |
| TG(18:1_18:1_23:0)  | TG | 4.06 | 1.35 | Up |
| TG(16:1_11:1_18:1)  | TG | 4.01 | 1.34 | Up |
| TG(30:1_18:1_23:1)  | TG | 3.93 | 1.31 | Up |
| TG(16:0_10:1_12:4)  | TG | 3.89 | 1.38 | Up |
| TG(9:0_12:0_14:1)   | TG | 3.88 | 1.33 | Up |
| TG(57:2e)           | TG | 3.87 | 1.36 | Up |
| TG(28:1_16:0_18:1)  | TG | 3.84 | 1.37 | Up |
| TG(16:1_14:2_18:1)  | TG | 3.81 | 1.38 | Up |
| TG(10:0_12:0_18:1)  | TG | 3.78 | 1.34 | Up |
| TG(16:0_9:0_14:0)   | TG | 3.75 | 1.35 | Up |
| TG(25:0_18:1_18:1)  | TG | 3.75 | 1.34 | Up |
| TG(52:7e)           | TG | 3.72 | 1.24 | Up |
| TG(6:0_20:3_22:1)   | TG | 3.70 | 1.14 | Up |
| TG(18:1e_16:0_16:0) | TG | 3.66 | 1.37 | Up |
| TG(16:0e_6:0_10:0)  | TG | 3.64 | 1.14 | Up |
| TG(16:0_18:1_24:1)  | TG | 3.62 | 1.36 | Up |
| TG(20:1e_16:0_18:1) | TG | 3.60 | 1.34 | Up |
| TG(18:1_11:1_12:1)  | TG | 3.58 | 1.34 | Up |
| TG(61:2e)           | TG | 3.57 | 1.33 | Up |
| TG(16:0_12:0_16:1)  | TG | 3.55 | 1.39 | Up |
| TG(16:0_10:3_16:0)  | TG | 3.50 | 1.13 | Up |
| TG(28:1_18:1_23:1)  | TG | 3.40 | 1.31 | Up |
| TG(53:1e)           | TG | 3.39 | 1.40 | Up |
| TG(14:1e_10:1_11:1) | TG | 3.32 | 1.26 | Up |
| TG(70:4)            | TG | 3.30 | 1.36 | Up |
| TG(12:1e_6:0_18:1)  | TG | 3.28 | 1.35 | Up |
| TG(55:7)            | TG | 3.27 | 1.16 | Up |
| TG(18:1_18:1_21:0)  | TG | 3.26 | 1.35 | Up |
| TG(30:1_18:1_18:1)  | TG | 3.26 | 1.32 | Up |

|                     |    |      |      |    |
|---------------------|----|------|------|----|
| TG(29:0_18:1_18:1)  | TG | 3.25 | 1.36 | Up |
| TG(44:1)            | TG | 3.24 | 1.30 | Up |
| TG(16:0_10:0_14:0)  | TG | 3.23 | 1.21 | Up |
| TG(16:0_10:1_10:1)  | TG | 3.19 | 1.32 | Up |
| TG(12:1e_6:0_16:0)  | TG | 3.18 | 1.36 | Up |
| TG(20:4e_18:1_18:2) | TG | 3.18 | 1.33 | Up |
| TG(4:0_17:1_18:2)   | TG | 3.11 | 1.27 | Up |
| TG(16:1_18:1_19:0)  | TG | 3.10 | 1.05 | Up |
| TG(16:1_6:0_16:1)   | TG | 3.09 | 1.37 | Up |
| TG(19:1_16:0_16:0)  | TG | 3.08 | 1.38 | Up |
| TG(30:1_16:0_18:1)  | TG | 3.07 | 1.30 | Up |
| TG(16:1_10:1_11:1)  | TG | 3.06 | 1.10 | Up |
| TG(20:4e_10:1_10:1) | TG | 3.06 | 1.33 | Up |
| TG(27:0_16:0_18:1)  | TG | 3.06 | 1.38 | Up |
| TG(29:1_16:0_18:1)  | TG | 3.06 | 1.37 | Up |
| TG(18:2e_18:1_22:0) | TG | 3.01 | 1.25 | Up |
| TG(20:0e_6:0_6:0)   | TG | 3.01 | 1.25 | Up |
| TG(15:0_18:1_18:1)  | TG | 3.00 | 1.32 | Up |
| TG(20:0e_18:1_18:1) | TG | 2.97 | 1.29 | Up |
| TG(16:0e_16:0_16:0) | TG | 2.94 | 1.13 | Up |
| TG(59:2e)           | TG | 2.94 | 1.35 | Up |
| TG(18:1e_16:0_18:1) | TG | 2.90 | 1.21 | Up |
| TG(55:4e)           | TG | 2.83 | 1.32 | Up |
| TG(16:1_12:0_16:1)  | TG | 2.82 | 1.30 | Up |
| TG(27:0_16:0_16:0)  | TG | 2.82 | 1.37 | Up |
| TG(69:2)            | TG | 2.77 | 1.35 | Up |
| TG(16:0e_18:1_18:1) | TG | 2.75 | 1.30 | Up |
| TG(4:0_16:0_16:1)   | TG | 2.73 | 1.34 | Up |
| TG(16:1_8:0_16:1)   | TG | 2.68 | 1.38 | Up |
| TG(30:1_18:1_19:1)  | TG | 2.60 | 1.26 | Up |
| TG(20:3e_18:3_18:3) | TG | 2.59 | 1.24 | Up |
| TG(16:0_6:0_13:0)   | TG | 2.58 | 1.24 | Up |
| TG(18:1_14:3_17:1)  | TG | 2.56 | 1.30 | Up |
| TG(25:1_18:0_18:0)  | TG | 2.50 | 1.21 | Up |
| TG(16:1_10:0_16:1)  | TG | 2.48 | 1.25 | Up |
| TG(28:1_18:1_18:1)  | TG | 2.48 | 1.33 | Up |
| TG(16:0_11:4_18:1)  | TG | 2.47 | 1.10 | Up |
| TG(18:3e_16:0_18:1) | TG | 2.47 | 1.28 | Up |
| TG(16:0_16:0_19:0)  | TG | 2.46 | 1.32 | Up |
| TG(12:1e_6:0_18:0)  | TG | 2.44 | 1.25 | Up |
| TG(20:1e_18:1_18:2) | TG | 2.44 | 1.09 | Up |
| TG(30:0_18:1_22:5)  | TG | 2.44 | 1.04 | Up |
| TG(18:2e_18:1_24:0) | TG | 2.40 | 1.03 | Up |
| TG(20:3e_16:0_18:1) | TG | 2.34 | 1.34 | Up |

|                     |      |      |      |      |
|---------------------|------|------|------|------|
| TG(11:0_16:1_18:1)  | TG   | 2.33 | 1.33 | Up   |
| TG(27:0_6:0_16:0)   | TG   | 2.30 | 1.30 | Up   |
| TG(16:1_11:2_12:0)  | TG   | 2.28 | 1.20 | Up   |
| TG(29:1_18:1_18:1)  | TG   | 2.26 | 1.32 | Up   |
| TG(28:1_18:1_24:2)  | TG   | 2.23 | 1.18 | Up   |
| TG(16:0_18:1_22:6)  | TG   | 2.22 | 1.33 | Up   |
| TG(16:1_14:3_18:1)  | TG   | 2.20 | 1.10 | Up   |
| TG(19:1_18:2_18:3)  | TG   | 2.20 | 1.25 | Up   |
| TG(26:1_18:1_18:1)  | TG   | 2.19 | 1.15 | Up   |
| TG(12:0e_10:4_18:3) | TG   | 2.16 | 1.12 | Up   |
| TG(12:0e_6:0_20:4)  | TG   | 2.16 | 1.31 | Up   |
| TG(55:1e)           | TG   | 2.16 | 1.04 | Up   |
| TG(18:1_18:2_20:3)  | TG   | 2.15 | 1.29 | Up   |
| TG(18:3e_18:1_18:3) | TG   | 2.15 | 1.25 | Up   |
| TG(16:0_12:2_18:2)  | TG   | 2.13 | 1.28 | Up   |
| TG(16:0_14:0_16:1)  | TG   | 2.12 | 1.33 | Up   |
| TG(15:0_14:0_16:1)  | TG   | 2.11 | 1.35 | Up   |
| TG(18:3e_6:0_10:1)  | TG   | 2.11 | 1.08 | Up   |
| TG(16:0e_16:0_22:6) | TG   | 2.10 | 1.36 | Up   |
| TG(18:0_11:2_12:0)  | TG   | 2.10 | 1.08 | Up   |
| TG(30:1_18:1_24:2)  | TG   | 2.07 | 1.14 | Up   |
| TG(4:0_16:0_20:4)   | TG   | 2.07 | 1.13 | Up   |
| TG(16:1_14:0_16:1)  | TG   | 2.04 | 1.39 | Up   |
| TG(15:0_16:0_18:1)  | TG   | 2.03 | 1.31 | Up   |
| TG(18:0_16:0_16:0)  | TG   | 2.02 | 1.14 | Up   |
| TG(27:1_18:1_18:1)  | TG   | 2.02 | 1.14 | Up   |
| WE(20:1_16:0)       | WE   | 6.15 | 1.39 | Up   |
| WE(22:1_16:0)       | WE   | 5.06 | 1.33 | Up   |
| WE(21:1_16:0)       | WE   | 4.28 | 1.33 | Up   |
| ZyE(32:3)           | ZyE  | 4.48 | 1.26 | Up   |
| ZyE(34:6)           | ZyE  | 4.23 | 1.39 | Up   |
| ZyE(33:6)           | ZyE  | 4.09 | 1.31 | Up   |
| ZyE(33:0)           | ZyE  | 2.50 | 1.16 | Up   |
| ZyE(32:0)           | ZyE  | 2.03 | 1.23 | Up   |
| AcCa(13:0)          | AcCa | 0.50 | 1.30 | Down |
| AcCa(8:0)           | AcCa | 0.50 | 1.08 | Down |
| AcCa(6:0)           | AcCa | 0.48 | 1.27 | Down |
| AcCa(21:1)          | AcCa | 0.45 | 1.18 | Down |
| AcCa(22:3)          | AcCa | 0.44 | 1.05 | Down |
| AcCa(19:0)          | AcCa | 0.43 | 1.10 | Down |
| AcCa(22:2)          | AcCa | 0.43 | 1.25 | Down |
| AcCa(22:6)          | AcCa | 0.43 | 1.18 | Down |
| AcCa(20:3)          | AcCa | 0.42 | 1.22 | Down |
| AcCa(14:3)          | AcCa | 0.39 | 1.12 | Down |



|                         |            |      |      |      |
|-------------------------|------------|------|------|------|
| AcCa(15:0)              | AcCa       | 0.37 | 1.11 | Down |
| AcCa(10:3)              | AcCa       | 0.35 | 1.33 | Down |
| AcCa(20:5)              | AcCa       | 0.29 | 1.25 | Down |
| AcCa(17:1)              | AcCa       | 0.26 | 1.08 | Down |
| AcCa(19:1)              | AcCa       | 0.24 | 1.14 | Down |
| AcCa(18:3)              | AcCa       | 0.20 | 1.19 | Down |
| AcCa(18:2)              | AcCa       | 0.16 | 1.19 | Down |
| BiotinylPE(30:5)        | BiotinylPE | 0.39 | 1.28 | Down |
| BiotinylPE(34:9)        | BiotinylPE | 0.39 | 1.33 | Down |
| BiotinylPE(28:3)        | BiotinylPE | 0.28 | 1.35 | Down |
| BisMePA(18:3e_16:1)     | BisMePA    | 0.50 | 1.21 | Down |
| BisMePA(40:8e)          | BisMePA    | 0.39 | 1.39 | Down |
| BisMePA(18:0_22:5)      | BisMePA    | 0.36 | 1.36 | Down |
| BisMePA(18:3e_15:0)     | BisMePA    | 0.30 | 1.36 | Down |
| BisMePA(38:1_16:0)      | BisMePA    | 0.30 | 1.39 | Down |
| BisMePA(30:1_18:3)      | BisMePA    | 0.28 | 1.34 | Down |
| BisMePA(16:2e_18:3)     | BisMePA    | 0.16 | 1.34 | Down |
| BisMePA(30:1_18:4)      | BisMePA    | 0.01 | 1.40 | Down |
| BisMePE(16:0_18:2)      | BisMePE    | 0.49 | 1.17 | Down |
| BisMePE(18:2_22:6)      | BisMePE    | 0.39 | 1.38 | Down |
| BisMePE(18:0_18:2)      | BisMePE    | 0.37 | 1.25 | Down |
| CarE(20:3)              | CarE       | 0.40 | 1.27 | Down |
| Cer(d18:1_21:0+O)       | Cer        | 0.49 | 1.20 | Down |
| Cer(d18:2_24:1)         | Cer        | 0.49 | 1.34 | Down |
| Cer(d18:1_22:2)         | Cer        | 0.44 | 1.30 | Down |
| Cer(t18:0_18:0)         | Cer        | 0.44 | 1.24 | Down |
| Cer(d18:2_24:2)         | Cer        | 0.43 | 1.30 | Down |
| Cer(d18:2_19:0)         | Cer        | 0.42 | 1.05 | Down |
| Cer(d18:1_20:4)         | Cer        | 0.38 | 1.37 | Down |
| Cer(d17:1_24:2)         | Cer        | 0.35 | 1.34 | Down |
| Cer(d18:1_26:2)         | Cer        | 0.35 | 1.38 | Down |
| Cer(d18:1_19:0)         | Cer        | 0.29 | 1.27 | Down |
| Cer(d18:2_21:2)         | Cer        | 0.20 | 1.28 | Down |
| CerG2GNAc1(d34:4)       | CerG2GNAc1 | 0.48 | 1.17 | Down |
| CerG2GNAc1(d36:3)       | CerG2GNAc1 | 0.46 | 1.21 | Down |
| CerG2GNAc1(t34:2)       | CerG2GNAc1 | 0.43 | 1.22 | Down |
| CerG2GNAc1(d38:8)       | CerG2GNAc1 | 0.41 | 1.28 | Down |
| CerG2GNAc1(d42:1+O)     | CerG2GNAc1 | 0.21 | 1.25 | Down |
| CerG3GNAc1(d42:3)       | CerG3GNAc1 | 0.38 | 1.19 | Down |
| CL(20:5_16:0_16:0_18:2) | CL         | 0.50 | 1.18 | Down |
| CL(84:12)               | CL         | 0.50 | 1.33 | Down |
| CL(71:7)                | CL         | 0.48 | 1.25 | Down |
| CL(78:13)               | CL         | 0.48 | 1.16 | Down |
| CL(21:0_22:6_16:0_18:1) | CL         | 0.47 | 1.33 | Down |

|                         |    |      |      |      |
|-------------------------|----|------|------|------|
| CL(81:6)                | CL | 0.47 | 1.30 | Down |
| CL(82:14)               | CL | 0.47 | 1.38 | Down |
| CL(82:15)               | CL | 0.47 | 1.36 | Down |
| CL(18:4_18:2_16:1_18:2) | CL | 0.46 | 1.35 | Down |
| CL(81:7)                | CL | 0.46 | 1.29 | Down |
| CL(83:11)               | CL | 0.45 | 1.34 | Down |
| CL(18:2_16:1_18:2_18:2) | CL | 0.44 | 1.30 | Down |
| CL(72:6)                | CL | 0.44 | 1.28 | Down |
| CL(70:1)                | CL | 0.43 | 1.19 | Down |
| CL(72:3)                | CL | 0.43 | 1.35 | Down |
| CL(77:9)                | CL | 0.43 | 1.36 | Down |
| CL(83:13)               | CL | 0.43 | 1.35 | Down |
| CL(66:5)                | CL | 0.42 | 1.30 | Down |
| CL(77:8)                | CL | 0.42 | 1.20 | Down |
| CL(83:5)                | CL | 0.42 | 1.26 | Down |
| CL(68:6)                | CL | 0.41 | 1.31 | Down |
| CL(72:2)                | CL | 0.41 | 1.28 | Down |
| CL(18:2_18:1_20:4_16:0) | CL | 0.40 | 1.23 | Down |
| CL(76:13)               | CL | 0.40 | 1.36 | Down |
| CL(81:5)                | CL | 0.40 | 1.33 | Down |
| CL(72:4)                | CL | 0.39 | 1.32 | Down |
| CL(78:6)                | CL | 0.39 | 1.32 | Down |
| CL(18:2_18:1_22:4_18:2) | CL | 0.37 | 1.08 | Down |
| CL(78:7)                | CL | 0.37 | 1.32 | Down |
| CL(82:9)                | CL | 0.37 | 1.29 | Down |
| CL(69:5)                | CL | 0.36 | 1.27 | Down |
| CL(18:2_20:4_18:1_18:1) | CL | 0.33 | 1.30 | Down |
| CL(18:4_20:4_18:2_18:2) | CL | 0.32 | 1.34 | Down |
| CL(78:12)               | CL | 0.32 | 1.16 | Down |
| CL(85:13)               | CL | 0.32 | 1.35 | Down |
| CL(89:18)               | CL | 0.32 | 1.36 | Down |
| CL(77:7)                | CL | 0.30 | 1.24 | Down |
| CL(18:1_16:0_16:0_18:1) | CL | 0.29 | 1.27 | Down |
| CL(72:9)                | CL | 0.29 | 1.31 | Down |
| CL(74:5)                | CL | 0.27 | 1.37 | Down |
| CL(85:12)               | CL | 0.27 | 1.28 | Down |
| CL(84:20)               | CL | 0.07 | 1.28 | Down |
| CL(82:17)               | CL | 0.05 | 1.33 | Down |
| DG(18:2_18:2)           | DG | 0.46 | 1.03 | Down |
| DG(34:4e)               | DG | 0.45 | 1.28 | Down |
| DG(18:3_18:2)           | DG | 0.40 | 1.13 | Down |
| DG(22:5_18:2)           | DG | 0.36 | 1.37 | Down |
| DG(18:2_14:1)           | DG | 0.23 | 1.33 | Down |
| DG(32:5)                | DG | 0.15 | 1.38 | Down |

|                     |         |      |      |      |
|---------------------|---------|------|------|------|
| DGDG(29:4)          | DGDG    | 0.13 | 1.35 | Down |
| DLCL(35:4)          | DLCL    | 0.42 | 1.29 | Down |
| DLCL(37:6)          | DLCL    | 0.42 | 1.25 | Down |
| DLCL(33:2)          | DLCL    | 0.24 | 1.37 | Down |
| dMePE(18:2_22:6)    | dMePE   | 0.49 | 1.27 | Down |
| dMePE(22:5_18:2)    | dMePE   | 0.46 | 1.37 | Down |
| dMePE(18:0_18:2)    | dMePE   | 0.45 | 1.30 | Down |
| dMePE(18:1_18:2)    | dMePE   | 0.44 | 1.26 | Down |
| dMePE(18:1_22:6)    | dMePE   | 0.40 | 1.39 | Down |
| dMePE(22:5_22:6)    | dMePE   | 0.32 | 1.38 | Down |
| dMePE(16:1_18:2)    | dMePE   | 0.31 | 1.25 | Down |
| dMePE(15:0_16:0)    | dMePE   | 0.30 | 1.28 | Down |
| dMePE(30:2)         | dMePE   | 0.30 | 1.38 | Down |
| dMePE(36:8)         | dMePE   | 0.29 | 1.39 | Down |
| dMePE(18:2_18:2)    | dMePE   | 0.27 | 1.29 | Down |
| dMePE(16:1_16:1)    | dMePE   | 0.26 | 1.27 | Down |
| dMePE(34:5)         | dMePE   | 0.26 | 1.39 | Down |
| dMePE(18:3_20:4)    | dMePE   | 0.25 | 1.37 | Down |
| dMePE(17:0_18:2)    | dMePE   | 0.21 | 1.28 | Down |
| dMePE(18:3_22:6)    | dMePE   | 0.12 | 1.41 | Down |
| GM1(m43:6)          | GM1     | 0.45 | 1.11 | Down |
| Hex1Cer(d15:1_20:4) | Hex1Cer | 0.50 | 1.26 | Down |
| Hex1Cer(t20:1_22:6) | Hex1Cer | 0.49 | 1.29 | Down |
| Hex1Cer(d15:1_22:6) | Hex1Cer | 0.47 | 1.28 | Down |
| Hex1Cer(d18:2_22:5) | Hex1Cer | 0.47 | 1.35 | Down |
| Hex1Cer(t38:2)      | Hex1Cer | 0.42 | 1.33 | Down |
| Hex1Cer(t42:5)      | Hex1Cer | 0.38 | 1.34 | Down |
| Hex1Cer(d17:0_22:6) | Hex1Cer | 0.35 | 1.37 | Down |
| Hex1Cer(d38:3)      | Hex1Cer | 0.34 | 1.37 | Down |
| Hex1Cer(t18:0_20:5) | Hex1Cer | 0.33 | 1.38 | Down |
| Hex1Cer(d35:3)      | Hex1Cer | 0.30 | 1.34 | Down |
| Hex1Cer(d16:2_22:5) | Hex1Cer | 0.24 | 1.38 | Down |
| Hex1Cer(t16:1_22:6) | Hex1Cer | 0.24 | 1.22 | Down |
| Hex1Cer(d22:2_20:4) | Hex1Cer | 0.14 | 1.23 | Down |
| Hex2Cer(d18:1_23:0) | Hex2Cer | 0.49 | 1.27 | Down |
| Hex2Cer(d18:1_24:1) | Hex2Cer | 0.47 | 1.33 | Down |
| Hex2Cer(m42:3)      | Hex2Cer | 0.47 | 1.37 | Down |
| Hex2Cer(d31:2)      | Hex2Cer | 0.44 | 1.22 | Down |
| Hex2Cer(d18:1_24:0) | Hex2Cer | 0.36 | 1.38 | Down |
| Hex3Cer(t34:2)      | Hex3Cer | 0.48 | 1.33 | Down |
| Hex3Cer(t38:1)      | Hex3Cer | 0.38 | 1.26 | Down |
| LBPA(18:1_18:2)     | LBPA    | 0.50 | 1.31 | Down |
| LBPA(20:3_20:4)     | LBPA    | 0.50 | 1.35 | Down |
| LBPA(20:4_20:4)     | LBPA    | 0.32 | 1.34 | Down |

|                 |        |      |      |      |
|-----------------|--------|------|------|------|
| LBPA(18:2_18:2) | LBPA   | 0.25 | 1.35 | Down |
| LdMePE(17:0)    | LdMePE | 0.49 | 1.37 | Down |
| LdMePE(18:3)    | LdMePE | 0.25 | 1.39 | Down |
| LdMePE(20:1)    | LdMePE | 0.25 | 1.31 | Down |
| LPC(20:1)       | LPC    | 0.45 | 1.20 | Down |
| LPC(17:1)       | LPC    | 0.44 | 1.39 | Down |
| LPC(24:1)       | LPC    | 0.44 | 1.33 | Down |
| LPC(14:0)       | LPC    | 0.43 | 1.39 | Down |
| LPC(26:1)       | LPC    | 0.43 | 1.23 | Down |
| LPC(19:0)       | LPC    | 0.38 | 1.34 | Down |
| LPC(18:3)       | LPC    | 0.31 | 1.33 | Down |
| LPC(19:1)       | LPC    | 0.31 | 1.35 | Down |
| LPC(24:2)       | LPC    | 0.27 | 1.37 | Down |
| LPC(18:3e)      | LPC    | 0.20 | 1.33 | Down |
| LPC(20:2e)      | LPC    | 0.19 | 1.31 | Down |
| LPE(18:3e)      | LPE    | 0.22 | 1.37 | Down |
| LPE(18:3)       | LPE    | 0.18 | 1.29 | Down |
| MePC(19:2)      | MePC   | 0.50 | 1.14 | Down |
| MePC(40:4e)     | MePC   | 0.48 | 1.17 | Down |
| MePC(40:8e)     | MePC   | 0.48 | 1.12 | Down |
| MePC(34:6e)     | MePC   | 0.47 | 1.37 | Down |
| MePC(36:3e)     | MePC   | 0.47 | 1.02 | Down |
| MePC(21:1e)     | MePC   | 0.46 | 1.31 | Down |
| MePC(34:3)      | MePC   | 0.46 | 1.35 | Down |
| MePC(40:1)      | MePC   | 0.46 | 1.06 | Down |
| MePC(32:2e)     | MePC   | 0.44 | 1.33 | Down |
| MePC(39:2e)     | MePC   | 0.43 | 1.19 | Down |
| MePC(31:4e)     | MePC   | 0.37 | 1.39 | Down |
| MePC(32:5)      | MePC   | 0.36 | 1.33 | Down |
| MePC(36:3)      | MePC   | 0.36 | 1.33 | Down |
| MePC(34:4)      | MePC   | 0.31 | 1.40 | Down |
| MePC(40:8)      | MePC   | 0.31 | 1.38 | Down |
| MePC(43:3)      | MePC   | 0.27 | 1.30 | Down |
| MePC(30:2)      | MePC   | 0.26 | 1.40 | Down |
| MePC(33:4)      | MePC   | 0.26 | 1.33 | Down |
| MePC(30:1)      | MePC   | 0.25 | 1.32 | Down |
| MePC(36:9)      | MePC   | 0.24 | 1.38 | Down |
| MePC(38:4)      | MePC   | 0.24 | 1.16 | Down |
| MePC(29:1)      | MePC   | 0.22 | 1.39 | Down |
| MePC(38:5)      | MePC   | 0.21 | 1.32 | Down |
| MePC(31:2e)     | MePC   | 0.18 | 1.36 | Down |
| MePC(32:6e)     | MePC   | 0.18 | 1.32 | Down |
| MGDG(38:3e)     | MGDG   | 0.45 | 1.31 | Down |
| MGDG(46:9)      | MGDG   | 0.41 | 1.11 | Down |

|                 |      |      |      |      |
|-----------------|------|------|------|------|
| MGDG(36:2e)     | MGDG | 0.40 | 1.34 | Down |
| MGDG(42:6)      | MGDG | 0.40 | 1.38 | Down |
| MGDG(18:1_22:5) | MGDG | 0.38 | 1.37 | Down |
| MGDG(40:7)      | MGDG | 0.22 | 1.35 | Down |
| MGDG(44:12)     | MGDG | 0.16 | 1.27 | Down |
| MGMG(38:2)      | MGMG | 0.47 | 1.32 | Down |
| MGMG(40:2)      | MGMG | 0.46 | 1.29 | Down |
| MGMG(38:3)      | MGMG | 0.45 | 1.31 | Down |
| MGMG(36:2)      | MGMG | 0.40 | 1.35 | Down |
| PC(14:1e_22:6)  | PC   | 0.50 | 1.36 | Down |
| PC(18:0e_18:2)  | PC   | 0.50 | 1.16 | Down |
| PC(18:2_23:0)   | PC   | 0.50 | 1.02 | Down |
| PC(34:4)        | PC   | 0.50 | 1.34 | Down |
| PC(18:2_20:4)   | PC   | 0.49 | 1.36 | Down |
| PC(24:0_18:2)   | PC   | 0.49 | 1.05 | Down |
| PC(32:4)        | PC   | 0.49 | 1.08 | Down |
| PC(40:0)        | PC   | 0.49 | 1.00 | Down |
| PC(20:4e_18:2)  | PC   | 0.48 | 1.36 | Down |
| PC(24:4e)       | PC   | 0.48 | 1.25 | Down |
| PC(36:2e)       | PC   | 0.48 | 1.31 | Down |
| PC(44:3e)       | PC   | 0.48 | 1.16 | Down |
| PC(16:2e_18:1)  | PC   | 0.47 | 1.08 | Down |
| PC(18:2e_22:6)  | PC   | 0.47 | 1.31 | Down |
| PC(33:2)        | PC   | 0.47 | 1.33 | Down |
| PC(16:1e_16:1)  | PC   | 0.46 | 1.36 | Down |
| PC(19:0_22:4)   | PC   | 0.46 | 1.35 | Down |
| PC(31:0_11:4)   | PC   | 0.46 | 1.28 | Down |
| PC(39:5)        | PC   | 0.46 | 1.39 | Down |
| PC(18:1_22:6)   | PC   | 0.45 | 1.36 | Down |
| PC(24:1_20:4)   | PC   | 0.45 | 1.28 | Down |
| PC(28:1)        | PC   | 0.45 | 1.23 | Down |
| PC(38:2)        | PC   | 0.45 | 1.40 | Down |
| PC(38:3)        | PC   | 0.45 | 1.41 | Down |
| PC(17:1_22:6)   | PC   | 0.44 | 1.23 | Down |
| PC(20:1_18:2)   | PC   | 0.44 | 1.35 | Down |
| PC(42:5e)       | PC   | 0.44 | 1.06 | Down |
| PC(10:1e_16:0)  | PC   | 0.43 | 1.23 | Down |
| PC(17:1_13:0)   | PC   | 0.43 | 1.30 | Down |
| PC(18:1e_18:2)  | PC   | 0.43 | 1.33 | Down |
| PC(20:1)        | PC   | 0.43 | 1.05 | Down |
| PC(20:2_14:1)   | PC   | 0.43 | 1.28 | Down |
| PC(36:3e)       | PC   | 0.43 | 1.32 | Down |
| PC(19:0_20:3)   | PC   | 0.42 | 1.29 | Down |
| PC(19:0_20:4)   | PC   | 0.42 | 1.38 | Down |

|                |    |      |      |      |
|----------------|----|------|------|------|
| PC(20:0_18:2)  | PC | 0.42 | 1.39 | Down |
| PC(41:4)       | PC | 0.42 | 1.32 | Down |
| PC(34:2e)      | PC | 0.41 | 1.34 | Down |
| PC(39:3e)      | PC | 0.41 | 1.29 | Down |
| PC(39:4)       | PC | 0.41 | 1.37 | Down |
| PC(44:12)      | PC | 0.41 | 1.26 | Down |
| PC(16:0_19:0)  | PC | 0.40 | 1.16 | Down |
| PC(17:0_22:4)  | PC | 0.40 | 1.35 | Down |
| PC(19:0_18:1)  | PC | 0.39 | 1.36 | Down |
| PC(20:2_22:6)  | PC | 0.39 | 1.35 | Down |
| PC(42:8)       | PC | 0.39 | 1.31 | Down |
| PC(18:1e_22:5) | PC | 0.38 | 1.33 | Down |
| PC(30:2)       | PC | 0.38 | 1.36 | Down |
| PC(46:7)       | PC | 0.38 | 1.22 | Down |
| PC(16:0e_18:2) | PC | 0.37 | 1.39 | Down |
| PC(17:1_18:1)  | PC | 0.37 | 1.25 | Down |
| PC(21:3e)      | PC | 0.37 | 1.12 | Down |
| PC(42:2)       | PC | 0.37 | 1.16 | Down |
| PC(44:3)       | PC | 0.37 | 1.05 | Down |
| PC(18:1_14:1)  | PC | 0.36 | 1.36 | Down |
| PC(18:1_18:2)  | PC | 0.36 | 1.38 | Down |
| PC(22:1_22:6)  | PC | 0.36 | 1.34 | Down |
| PC(35:2)       | PC | 0.36 | 1.40 | Down |
| PC(12:1e_22:6) | PC | 0.35 | 1.39 | Down |
| PC(32:2)       | PC | 0.35 | 1.38 | Down |
| PC(38:3e)      | PC | 0.35 | 1.36 | Down |
| PC(41:6)       | PC | 0.35 | 1.27 | Down |
| PC(19:3e)      | PC | 0.34 | 1.30 | Down |
| PC(16:1_18:2)  | PC | 0.33 | 1.39 | Down |
| PC(16:1e_20:5) | PC | 0.33 | 1.35 | Down |
| PC(18:4_20:4)  | PC | 0.32 | 1.32 | Down |
| PC(19:0_22:6)  | PC | 0.32 | 1.30 | Down |
| PC(20:2)       | PC | 0.32 | 1.28 | Down |
| PC(35:0)       | PC | 0.32 | 1.39 | Down |
| PC(16:1_20:5)  | PC | 0.31 | 1.37 | Down |
| PC(18:0_11:1)  | PC | 0.31 | 1.31 | Down |
| PC(18:3_20:5)  | PC | 0.31 | 1.37 | Down |
| PC(24:2_18:2)  | PC | 0.31 | 1.34 | Down |
| PC(44:11)      | PC | 0.31 | 1.38 | Down |
| PC(44:5e)      | PC | 0.31 | 1.30 | Down |
| PC(46:5)       | PC | 0.31 | 1.13 | Down |
| PC(12:1e_18:1) | PC | 0.30 | 1.36 | Down |
| PC(16:0e_20:5) | PC | 0.30 | 1.33 | Down |
| PC(17:0_18:2)  | PC | 0.30 | 1.39 | Down |

|                |    |      |      |      |
|----------------|----|------|------|------|
| PC(19:0_18:2)  | PC | 0.30 | 1.40 | Down |
| PC(20:3_22:4)  | PC | 0.30 | 1.38 | Down |
| PC(22:5_22:6)  | PC | 0.30 | 1.39 | Down |
| PC(34:4e)      | PC | 0.30 | 1.34 | Down |
| PC(18:3_13:0)  | PC | 0.29 | 1.29 | Down |
| PC(20:1_22:6)  | PC | 0.29 | 1.37 | Down |
| PC(22:5_18:2)  | PC | 0.29 | 1.40 | Down |
| PC(35:3)       | PC | 0.29 | 1.35 | Down |
| PC(18:3_18:2)  | PC | 0.27 | 1.36 | Down |
| PC(19:0_22:5)  | PC | 0.27 | 1.40 | Down |
| PC(20:5_22:6)  | PC | 0.27 | 1.27 | Down |
| PC(31:0e)      | PC | 0.27 | 1.35 | Down |
| PC(37:2)       | PC | 0.26 | 1.37 | Down |
| PC(17:1_18:2)  | PC | 0.25 | 1.40 | Down |
| PC(18:3e_20:4) | PC | 0.25 | 1.34 | Down |
| PC(18:3_20:4)  | PC | 0.24 | 1.38 | Down |
| PC(18:2_18:2)  | PC | 0.23 | 1.37 | Down |
| PC(33:3)       | PC | 0.23 | 1.32 | Down |
| PC(16:1e_20:3) | PC | 0.21 | 1.33 | Down |
| PC(39:2e)      | PC | 0.21 | 1.19 | Down |
| PC(33:4)       | PC | 0.20 | 1.35 | Down |
| PC(40:9e)      | PC | 0.19 | 1.32 | Down |
| PC(43:1e)      | PC | 0.19 | 1.32 | Down |
| PC(36:7)       | PC | 0.18 | 1.39 | Down |
| PC(18:3_22:5)  | PC | 0.17 | 1.39 | Down |
| PC(40:10)      | PC | 0.15 | 1.40 | Down |
| PC(18:3_22:6)  | PC | 0.14 | 1.40 | Down |
| PC(31:5)       | PC | 0.14 | 1.38 | Down |
| PC(40:9)       | PC | 0.14 | 1.37 | Down |
| PC(18:3e_22:6) | PC | 0.12 | 1.36 | Down |
| PC(45:4)       | PC | 0.12 | 1.32 | Down |
| PC(14:0_18:3)  | PC | 0.11 | 1.40 | Down |
| PC(42:1e)      | PC | 0.06 | 1.28 | Down |
| PE(44:4)       | PE | 0.49 | 1.31 | Down |
| PE(18:1p_16:1) | PE | 0.48 | 1.24 | Down |
| PE(19:0_18:1)  | PE | 0.47 | 1.38 | Down |
| PE(20:3_18:2)  | PE | 0.47 | 1.37 | Down |
| PE(18:1_18:2)  | PE | 0.46 | 1.38 | Down |
| PE(18:1_24:2)  | PE | 0.46 | 1.16 | Down |
| PE(18:1e_15:0) | PE | 0.46 | 1.40 | Down |
| PE(20:1_22:6)  | PE | 0.46 | 1.37 | Down |
| PE(16:2e_22:6) | PE | 0.45 | 1.31 | Down |
| PE(18:2e_16:1) | PE | 0.45 | 1.28 | Down |
| PE(20:2_22:6)  | PE | 0.45 | 1.31 | Down |

|                |    |      |      |      |
|----------------|----|------|------|------|
| PE(17:0_20:3)  | PE | 0.44 | 1.31 | Down |
| PE(19:0_22:4)  | PE | 0.44 | 1.35 | Down |
| PE(38:6e)      | PE | 0.44 | 1.38 | Down |
| PE(16:1e_20:3) | PE | 0.43 | 1.22 | Down |
| PE(16:1e_20:5) | PE | 0.42 | 1.33 | Down |
| PE(18:3e_20:4) | PE | 0.42 | 1.26 | Down |
| PE(24:0_18:2)  | PE | 0.41 | 1.35 | Down |
| PE(16:0_24:1)  | PE | 0.40 | 1.35 | Down |
| PE(17:1_16:0)  | PE | 0.40 | 1.35 | Down |
| PE(18:3e_22:6) | PE | 0.40 | 1.39 | Down |
| PE(22:4_18:2)  | PE | 0.40 | 1.38 | Down |
| PE(22:5_22:6)  | PE | 0.40 | 1.37 | Down |
| PE(18:1p_22:5) | PE | 0.39 | 1.39 | Down |
| PE(22:5_22:5)  | PE | 0.39 | 1.17 | Down |
| PE(40:5)       | PE | 0.39 | 1.38 | Down |
| PE(16:0p_20:5) | PE | 0.38 | 1.21 | Down |
| PE(20:2_22:4)  | PE | 0.38 | 1.35 | Down |
| PE(38:0)       | PE | 0.38 | 1.18 | Down |
| PE(16:1_18:1)  | PE | 0.37 | 1.37 | Down |
| PE(18:0_16:1)  | PE | 0.37 | 1.20 | Down |
| PE(18:2e_15:0) | PE | 0.37 | 1.38 | Down |
| PE(20:1_18:1)  | PE | 0.37 | 1.40 | Down |
| PE(22:4_22:5)  | PE | 0.37 | 1.35 | Down |
| PE(16:1_16:1)  | PE | 0.34 | 1.33 | Down |
| PE(16:0p_18:2) | PE | 0.33 | 1.32 | Down |
| PE(16:1_20:5)  | PE | 0.33 | 1.38 | Down |
| PE(22:2_22:6)  | PE | 0.33 | 1.31 | Down |
| PE(19:0_22:6)  | PE | 0.32 | 1.36 | Down |
| PE(20:5_22:6)  | PE | 0.31 | 1.37 | Down |
| PE(17:0_18:2)  | PE | 0.30 | 1.30 | Down |
| PE(18:1p_15:0) | PE | 0.30 | 1.36 | Down |
| PE(18:2p_22:6) | PE | 0.30 | 1.40 | Down |
| PE(19:0_18:2)  | PE | 0.30 | 1.38 | Down |
| PE(20:3p_22:4) | PE | 0.30 | 1.37 | Down |
| PE(40:9e)      | PE | 0.30 | 1.40 | Down |
| PE(40:9)       | PE | 0.29 | 1.40 | Down |
| PE(19:1_18:1)  | PE | 0.28 | 1.25 | Down |
| PE(18:2p_20:4) | PE | 0.27 | 1.38 | Down |
| PE(36:4e)      | PE | 0.27 | 1.39 | Down |
| PE(16:0_18:3)  | PE | 0.26 | 1.29 | Down |
| PE(18:3_18:2)  | PE | 0.26 | 1.39 | Down |
| PE(22:5_18:2)  | PE | 0.25 | 1.38 | Down |
| PE(18:1_18:3)  | PE | 0.24 | 1.37 | Down |
| PE(20:3p_22:6) | PE | 0.23 | 1.40 | Down |



|                |     |      |      |      |
|----------------|-----|------|------|------|
| PE(42:10e)     | PE  | 0.22 | 1.40 | Down |
| PE(18:2p_18:2) | PE  | 0.21 | 1.35 | Down |
| PE(18:3_20:4)  | PE  | 0.20 | 1.39 | Down |
| PE(18:2p_22:5) | PE  | 0.19 | 1.39 | Down |
| PE(18:3_22:6)  | PE  | 0.18 | 1.40 | Down |
| PE(18:3_20:3)  | PE  | 0.17 | 1.39 | Down |
| PE(18:3e_18:2) | PE  | 0.17 | 1.40 | Down |
| PE(18:2p_14:0) | PE  | 0.16 | 1.34 | Down |
| PE(32:1e)      | PE  | 0.16 | 1.34 | Down |
| PE(18:3e)      | PE  | 0.15 | 1.26 | Down |
| PE(40:8e)      | PE  | 0.15 | 1.39 | Down |
| PE(14:0_18:2)  | PE  | 0.14 | 1.38 | Down |
| PE(34:5)       | PE  | 0.14 | 1.38 | Down |
| PE(18:3e_14:0) | PE  | 0.13 | 1.37 | Down |
| PE(36:5e)      | PE  | 0.08 | 1.32 | Down |
| PE(32:3)       | PE  | 0.07 | 1.35 | Down |
| PE(16:1_18:3)  | PE  | 0.06 | 1.39 | Down |
| PE(38:8e)      | PE  | 0.03 | 1.26 | Down |
| PEt(40:6)      | PEt | 0.46 | 1.30 | Down |
| PEt(17:0_18:1) | PEt | 0.44 | 1.20 | Down |
| PEt(42:5)      | PEt | 0.35 | 1.11 | Down |
| PEt(44:7)      | PEt | 0.35 | 1.37 | Down |
| PEt(19:1_18:1) | PEt | 0.27 | 1.19 | Down |
| PEt(42:7)      | PEt | 0.22 | 1.20 | Down |
| PG(20:1_22:6)  | PG  | 0.49 | 1.26 | Down |
| PG(20:2_18:2)  | PG  | 0.49 | 1.10 | Down |
| PG(18:0_20:2)  | PG  | 0.46 | 1.38 | Down |
| PG(38:4)       | PG  | 0.46 | 1.20 | Down |
| PG(16:0_18:2)  | PG  | 0.44 | 1.22 | Down |
| PG(42:7)       | PG  | 0.43 | 1.27 | Down |
| PG(20:4_22:6)  | PG  | 0.41 | 1.30 | Down |
| PG(22:4_20:4)  | PG  | 0.41 | 1.27 | Down |
| PG(22:4_22:6)  | PG  | 0.40 | 1.29 | Down |
| PG(22:6_22:6)  | PG  | 0.40 | 1.28 | Down |
| PG(40:9)       | PG  | 0.40 | 1.38 | Down |
| PG(15:0_18:1)  | PG  | 0.39 | 1.36 | Down |
| PG(16:1_18:2)  | PG  | 0.38 | 1.31 | Down |
| PG(14:0_18:2)  | PG  | 0.37 | 1.31 | Down |
| PG(16:0_18:3)  | PG  | 0.37 | 1.27 | Down |
| PG(20:2_20:4)  | PG  | 0.37 | 1.22 | Down |
| PG(22:4_22:5)  | PG  | 0.32 | 1.31 | Down |
| PG(45:0)       | PG  | 0.32 | 1.28 | Down |
| PG(36:3)       | PG  | 0.30 | 1.39 | Down |
| PG(20:3_18:2)  | PG  | 0.28 | 1.36 | Down |

|                |      |      |      |      |
|----------------|------|------|------|------|
| PG(18:2_20:4)  | PG   | 0.27 | 1.35 | Down |
| PG(37:2)       | PG   | 0.26 | 1.08 | Down |
| PG(22:5_20:4)  | PG   | 0.24 | 1.38 | Down |
| PG(34:1)       | PG   | 0.24 | 1.32 | Down |
| PG(20:5_20:4)  | PG   | 0.23 | 1.36 | Down |
| PG(20:5_22:6)  | PG   | 0.23 | 1.37 | Down |
| PG(22:4_18:2)  | PG   | 0.23 | 1.34 | Down |
| PG(22:5_22:6)  | PG   | 0.23 | 1.37 | Down |
| PG(22:4_22:4)  | PG   | 0.18 | 1.25 | Down |
| PG(16:1_22:6)  | PG   | 0.16 | 1.38 | Down |
| PG(18:2_18:2)  | PG   | 0.16 | 1.39 | Down |
| PG(18:3_18:2)  | PG   | 0.14 | 1.39 | Down |
| PI(18:1_22:6)  | PI   | 0.49 | 1.34 | Down |
| PI(31:0)       | PI   | 0.49 | 1.29 | Down |
| PI(18:1_22:5)  | PI   | 0.42 | 1.36 | Down |
| PI(18:2_20:4)  | PI   | 0.41 | 1.40 | Down |
| PI(33:1)       | PI   | 0.41 | 1.17 | Down |
| PI(38:3)       | PI   | 0.38 | 1.35 | Down |
| PI(16:0_20:3)  | PI   | 0.30 | 1.24 | Down |
| PI(18:1_18:2)  | PI   | 0.24 | 1.36 | Down |
| PMe(20:1_18:1) | PMe  | 0.27 | 1.19 | Down |
| PS(44:9)       | PS   | 0.49 | 1.13 | Down |
| PS(36:0)       | PS   | 0.41 | 1.26 | Down |
| PS(40:6e)      | PS   | 0.41 | 1.27 | Down |
| PS(35:1)       | PS   | 0.36 | 1.36 | Down |
| PS(39:5)       | PS   | 0.31 | 1.37 | Down |
| PS(38:7e)      | PS   | 0.26 | 1.38 | Down |
| PS(33:1)       | PS   | 0.25 | 1.37 | Down |
| PS(42:11)      | PS   | 0.23 | 1.41 | Down |
| PS(41:7)       | PS   | 0.20 | 1.38 | Down |
| PS(35:2)       | PS   | 0.17 | 1.39 | Down |
| SM(d18:1_24:3) | SM   | 0.50 | 1.33 | Down |
| SM(d42:3)      | SM   | 0.47 | 1.32 | Down |
| SM(d44:6)      | SM   | 0.47 | 1.36 | Down |
| SM(d37:1)      | SM   | 0.46 | 1.36 | Down |
| SM(d42:4)      | SM   | 0.46 | 1.31 | Down |
| SM(d18:2_24:1) | SM   | 0.45 | 1.34 | Down |
| SM(d39:4)      | SM   | 0.42 | 1.27 | Down |
| SM(d44:3)      | SM   | 0.41 | 1.31 | Down |
| SM(d44:4)      | SM   | 0.28 | 1.27 | Down |
| SM(d41:3)      | SM   | 0.27 | 1.36 | Down |
| SQDG(48:5)     | SQDG | 0.43 | 1.21 | Down |
| SQDG(38:9)     | SQDG | 0.29 | 1.35 | Down |
| SQDG(40:6)     | SQDG | 0.15 | 1.08 | Down |

|                     |    |      |      |      |
|---------------------|----|------|------|------|
| ST(d44:2)           | ST | 0.37 | 1.27 | Down |
| TG(15:0_18:2_18:3)  | TG | 0.50 | 1.32 | Down |
| TG(18:1_17:1_18:3)  | TG | 0.49 | 1.37 | Down |
| TG(20:0e_18:3_18:4) | TG | 0.49 | 1.35 | Down |
| TG(51:11)           | TG | 0.48 | 1.25 | Down |
| TG(53:6)            | TG | 0.48 | 1.11 | Down |
| TG(48:10)           | TG | 0.47 | 1.33 | Down |
| TG(18:3_18:2_18:2)  | TG | 0.45 | 1.29 | Down |
| TG(25:1_18:2_24:2)  | TG | 0.45 | 1.12 | Down |
| TG(16:0_17:0_20:5)  | TG | 0.44 | 1.25 | Down |
| TG(16:0e_18:1_18:2) | TG | 0.44 | 1.19 | Down |
| TG(16:1e_18:1_22:6) | TG | 0.44 | 1.28 | Down |
| TG(18:0_18:1_22:3)  | TG | 0.44 | 1.38 | Down |
| TG(19:0_18:1_18:2)  | TG | 0.44 | 1.37 | Down |
| TG(18:2e_18:1_18:1) | TG | 0.42 | 1.30 | Down |
| TG(18:4_16:1_18:3)  | TG | 0.42 | 1.25 | Down |
| TG(12:1e_6:0_18:4)  | TG | 0.40 | 1.06 | Down |
| TG(20:0e_22:6_22:6) | TG | 0.40 | 1.40 | Down |
| TG(18:3_17:1_18:2)  | TG | 0.39 | 1.34 | Down |
| TG(57:11)           | TG | 0.39 | 1.24 | Down |
| TG(16:1_18:2_18:3)  | TG | 0.38 | 1.31 | Down |
| TG(18:1_18:2_21:1)  | TG | 0.38 | 1.32 | Down |
| TG(19:1_10:4_22:6)  | TG | 0.37 | 1.38 | Down |
| TG(19:1_18:1_18:2)  | TG | 0.37 | 1.37 | Down |
| TG(16:0_18:1_18:3)  | TG | 0.36 | 1.29 | Down |
| TG(16:0e_16:1_18:2) | TG | 0.36 | 1.23 | Down |
| TG(18:2_18:2_23:1)  | TG | 0.36 | 1.38 | Down |
| TG(18:3_18:3_20:4)  | TG | 0.36 | 1.08 | Down |
| TG(72:6)            | TG | 0.36 | 1.29 | Down |
| TG(19:1_18:2_18:2)  | TG | 0.34 | 1.40 | Down |
| TG(22:5_14:1_22:5)  | TG | 0.34 | 1.36 | Down |
| TG(18:0_18:3_20:1)  | TG | 0.33 | 1.27 | Down |
| TG(18:1_20:4_20:4)  | TG | 0.33 | 1.34 | Down |
| TG(16:0_16:0_22:6)  | TG | 0.32 | 1.31 | Down |
| TG(22:5_18:2_18:2)  | TG | 0.32 | 1.38 | Down |
| TG(72:8)            | TG | 0.32 | 1.26 | Down |
| TG(18:2_18:2_20:4)  | TG | 0.31 | 1.38 | Down |
| TG(18:3_18:2_22:6)  | TG | 0.31 | 1.19 | Down |
| TG(33:4)            | TG | 0.31 | 1.35 | Down |
| TG(6:0_18:1_18:3)   | TG | 0.31 | 1.24 | Down |
| TG(18:0_18:1_20:2)  | TG | 0.30 | 1.39 | Down |
| TG(57:12)           | TG | 0.30 | 1.39 | Down |
| TG(16:0e_18:2_18:2) | TG | 0.28 | 1.31 | Down |
| TG(45:4)            | TG | 0.27 | 1.34 | Down |

|                     |     |      |      |      |
|---------------------|-----|------|------|------|
| TG(59:7e)           | TG  | 0.25 | 1.33 | Down |
| TG(20:2_20:5_20:5)  | TG  | 0.24 | 1.30 | Down |
| TG(18:3_17:1_20:5)  | TG  | 0.23 | 1.38 | Down |
| TG(26:1_11:4_18:2)  | TG  | 0.18 | 1.39 | Down |
| TG(18:1_18:2_24:2)  | TG  | 0.15 | 1.39 | Down |
| TG(32:5e)           | TG  | 0.15 | 1.38 | Down |
| TG(20:0_18:1_20:3)  | TG  | 0.14 | 1.41 | Down |
| TG(16:1e_16:0_18:2) | TG  | 0.12 | 1.29 | Down |
| TG(57:8)            | TG  | 0.06 | 1.38 | Down |
| TG(18:3_18:2_18:3)  | TG  | 0.04 | 1.41 | Down |
| TG(18:3_18:3_20:5)  | TG  | 0.04 | 1.41 | Down |
| WE(3:0_20:3)        | WE  | 0.27 | 1.31 | Down |
| ZyE(15:0)           | ZyE | 0.47 | 1.31 | Down |

Supplementary Table S2: Potential lipid biomarkers based on the criteria of  $FC \geq 2$  or  $\leq 0.5$  and  $VIP > 1$  in AX vs. HFD.

| Lipid species           | Class      | FC   | VIP  | Trend |
|-------------------------|------------|------|------|-------|
| Cer(d18:2_21:2)         | Cer        | 2.94 | 1.34 | Up    |
| CerG2GNAc1(d42:1+O)     | CerG2GNAc1 | 2.80 | 1.52 | Up    |
| CL(18:1_16:0_16:0_18:1) | CL         | 4.52 | 1.49 | Up    |
| CL(18:2_18:1_22:4_18:2) | CL         | 4.09 | 1.47 | Up    |
| CL(66:2)                | CL         | 3.63 | 1.48 | Up    |
| CL(18:2_20:4_18:1_18:1) | CL         | 3.55 | 1.59 | Up    |
| CL(18:3_18:2_18:1_16:0) | CL         | 3.18 | 1.46 | Up    |
| CL(18:2_18:2_22:6_18:1) | CL         | 3.11 | 1.39 | Up    |
| CL(18:1_16:0_16:0_18:2) | CL         | 2.99 | 1.45 | Up    |
| CL(18:2_18:1_20:4_16:0) | CL         | 2.99 | 1.54 | Up    |
| CL(20:2_18:1_18:2_18:1) | CL         | 2.77 | 1.55 | Up    |
| CL(18:2_18:1_16:0_18:1) | CL         | 2.76 | 1.50 | Up    |
| CL(20:2_16:0_18:2_18:1) | CL         | 2.69 | 1.56 | Up    |
| CL(66:3)                | CL         | 2.63 | 1.48 | Up    |
| CL(69:5)                | CL         | 2.50 | 1.46 | Up    |
| CL(18:1_16:1_16:0_18:2) | CL         | 2.30 | 1.48 | Up    |
| CL(18:2_18:2_18:2_18:1) | CL         | 2.24 | 1.50 | Up    |
| CL(73:7)                | CL         | 2.15 | 1.42 | Up    |
| CL(20:2_18:2_18:1_18:2) | CL         | 2.13 | 1.53 | Up    |
| CL(18:2_18:1_18:1_18:2) | CL         | 2.10 | 1.57 | Up    |
| CL(18:2_18:1_16:1_18:1) | CL         | 2.06 | 1.50 | Up    |
| CL(18:2_18:1_18:2_22:5) | CL         | 2.05 | 1.38 | Up    |
| CL(18:2_16:1_18:2_18:1) | CL         | 2.02 | 1.45 | Up    |
| MLCL(52:3)              | MLCL       | 2.97 | 1.39 | Up    |
| PG(42:7)                | PG         | 2.37 | 1.54 | Up    |
| PG(38:4)                | PG         | 2.12 | 1.44 | Up    |
| PG(20:5_22:6)           | PG         | 2.04 | 1.43 | Up    |
| PS(18:0_22:5)           | PS         | 3.63 | 1.46 | Up    |

|                     |      |      |      |      |
|---------------------|------|------|------|------|
| PS(17:0_22:6)       | PS   | 2.06 | 1.41 | Up   |
| SQDG(51:12)         | SQDG | 2.01 | 1.59 | Up   |
| TG(16:0_18:1_20:4)  | TG   | 6.82 | 1.49 | Up   |
| TG(16:0_16:0_22:6)  | TG   | 2.04 | 1.55 | Up   |
| WE(13:0_16:3)       | WE   | 2.36 | 1.58 | Up   |
| Cer(m18:1_20:0)     | Cer  | 0.48 | 1.50 | Down |
| Cer(m18:1_18:0)     | Cer  | 0.42 | 1.68 | Down |
| Cer(m18:1_21:0)     | Cer  | 0.42 | 1.64 | Down |
| Cer(t42:3)          | Cer  | 0.27 | 1.54 | Down |
| DG(16:0_18:3)       | DG   | 0.49 | 1.40 | Down |
| DG(50:0)            | DG   | 0.46 | 1.61 | Down |
| DG(54:2)            | DG   | 0.39 | 1.35 | Down |
| DG(30:5e)           | DG   | 0.36 | 1.42 | Down |
| DG(18:2_18:2)       | DG   | 0.33 | 1.33 | Down |
| PC(28:1_18:2)       | PC   | 0.38 | 1.38 | Down |
| PS(34:0)            | PS   | 0.49 | 1.44 | Down |
| SM(t18:0_24:3)      | SM   | 0.46 | 1.52 | Down |
| TG(26:0_18:1_24:2)  | TG   | 0.50 | 1.36 | Down |
| TG(30:0_18:1_24:2)  | TG   | 0.50 | 1.35 | Down |
| TG(16:0_11:3_16:0)  | TG   | 0.49 | 1.61 | Down |
| TG(8:0_18:1_18:2)   | TG   | 0.48 | 1.34 | Down |
| TG(30:1_18:1_20:2)  | TG   | 0.47 | 1.34 | Down |
| TG(27:1_18:1_24:2)  | TG   | 0.46 | 1.34 | Down |
| TG(18:1_11:1_14:2)  | TG   | 0.45 | 1.55 | Down |
| TG(25:0_18:1_18:1)  | TG   | 0.45 | 1.34 | Down |
| TG(61:2e)           | TG   | 0.45 | 1.37 | Down |
| TG(18:1_18:1_23:0)  | TG   | 0.44 | 1.34 | Down |
| TG(16:0_11:4_18:1)  | TG   | 0.43 | 1.49 | Down |
| TG(18:1_18:1_24:0)  | TG   | 0.43 | 1.36 | Down |
| TG(70:3)            | TG   | 0.43 | 1.40 | Down |
| TG(16:1_11:2_14:0)  | TG   | 0.41 | 1.57 | Down |
| TG(18:0e_16:0_18:1) | TG   | 0.41 | 1.40 | Down |
| TG(72:4)            | TG   | 0.41 | 1.37 | Down |
| TG(28:1_18:2_24:2)  | TG   | 0.40 | 1.40 | Down |
| TG(37:2)            | TG   | 0.40 | 1.50 | Down |
| TG(16:0_11:3_14:1)  | TG   | 0.39 | 1.38 | Down |
| TG(20:1e_16:0_18:1) | TG   | 0.39 | 1.35 | Down |
| TG(28:1_18:1_18:2)  | TG   | 0.37 | 1.33 | Down |
| TG(16:0_11:4_16:0)  | TG   | 0.29 | 1.57 | Down |
| WE(20:1_16:0)       | WE   | 0.49 | 1.65 | Down |
| WE(22:1_16:0)       | WE   | 0.43 | 1.61 | Down |
| WE(21:1_16:0)       | WE   | 0.40 | 1.47 | Down |
| ZyE(33:0)           | ZyE  | 0.40 | 1.35 | Down |

---
